# Supplementary material for: Creatinine measurement from finger stick dried blood spots with a routine chemistry analyzer for estimation of GFR
Source: publisher site journal article supplement (doi:10.1515/cclm-2025-0979), 2025-11-03
Supplement: Supplementary file 1 [file j_cclm-2025-0979_suppl_004.docx]

**Legends to Supplemental Figures**

**Figure S1. Method comparison of venous Lithium Heparin (LH) plasma and capillary finger stick DBS** **– uncorrected for Hct**

A) Calibration line for DBS creatinine was calculated with linear regression. Range of plasma creatinine: 56-346μmol/L; n = 5.

B) Method comparison for DBS creatinine with the line of identity (red) and Deming linear regression (black). Storage time of DBS cards is displayed in • (1 day, n=82), ■ (2 days, n=20), ▲ (3 days, n=13), total n=115. Average plasma creatinine [stdev] = 112 [112] mol/L.

C) Bias plot from method comparison of panel B.

D) Method comparison for DBS eGFR with the line of identity (red) and Deming linear regression (black). Average eGFR [stdev] = 70 [24] L/min/1,73m2; n = 115. Dotted lines show the reference interval.

E) Bias plot from method comparison of panel D. All 95% confidence intervals are shown in between brackets. DBS, dried blood spot; eGFR, estimated glomerular filtration rate.

**Supplemental Figure S2. Creatinine method comparison between venous LH plasma and DBS with venous EDTA whole blood – Hct corrected**

a) Calibration line for DBS creatinine, calibration line (range: 18 - 615 µmol/L) was calculated with linear regression; n = 20.

b) Method comparison for DBS creatinine (range: 0 - 706 µmol/L) with the line of identity (red) and deming linear regression (black); n = 60.

c) Bias plot from method comparison of panel b with the bias as a line (black). Dotted lines show the 95% CI of bias (black).

d) Method comparison for DBS eGFR (range: 6 - >90 mL/min/1,73m2) with the line of identity (red) and deming linear regression (black); n = 60. Dotted lines show the cut-off for kidney function (60 mL/min/1,73m2).

e) Bias plot from method comparison of panel d with the bias as a line (black). Dotted lines show the 95% CI of bias (black).

**Supplementary Figure 3 Stability of eGFR from DBS.**

DBS cards with venous EDTA whole blood were stored for a varying number of days (0 to 31 days, x-axis) under varying storage temperatures. A; −20°C, B; 4°C, C; 20°C and D; +37°C per condition n = 20. Dotted line shows the cut-off for kidney function (60 mL/min/1,73m2). Under each graph, a table with a classification of patient samples per reference interval is depicted. TV; target value
