# Supplementary material for: Creatinine measurement from finger stick dried blood spots with a routine chemistry analyzer for estimation of GFR
Source: publisher site journal article supplement (doi:10.1515/cclm-2025-0979), 2025-11-03
Supplement: Supplementary file 2 [file j_cclm-2025-0979_suppl_005.docx]

Method comparison of venous plasma creatinine with creatinine DBS using capillary calibration curve with Hct-correction.

|  |  |  |  |
| --- | --- | --- | --- |
|  | True | False |  |
| Positive | 31 | 3 |  |
| Negative | 79 | 3 |  |
|  |  |  |  |
| Sensitivity | 91% | PPV | 91% |
| Specificity | 96% | NPV | 96% |

Method comparison of venous plasma creatinine with creatinine DBS using capillary calibration curve without Hct-correction.

|  |  |  |  |
| --- | --- | --- | --- |
|  | True | False |  |
| Positive | 29 | 6 |  |
| Negative | 76 | 5 |  |
|  |  |  |  |
| Sensitivity | 85% | PPV | 83% |
| Specificity | 93% | NPV | 94% |
